# Supplementary material for: Cobalt incorporation and MoS2–NiS2 heterostructure synergistic for improving full water electrolysis efficiency
Source: Royal Society of Chemistry journal article supplement (doi:10.1039/d3nj00755c), 2023-01-01
Supplement: d3nj00755c1.pdf [file d3nj00755c1.pdf]

## **Cobalt Incorporation and MoS<sub>2</sub>-NiS<sub>2</sub> Heterostructure**

### **Synergistic Improving Full Water Electrolysis Efficiency**

Minyu Wu, Xiangdong Meng, Min Zhou\*, Yuxue Zhou\*

*College of Physical Science and Technology, Yangzhou University, Yangzhou  
225002, China.*

E-mail: minzhou@yzu.edu.cn, yxzhou@yzu.edu.cn.

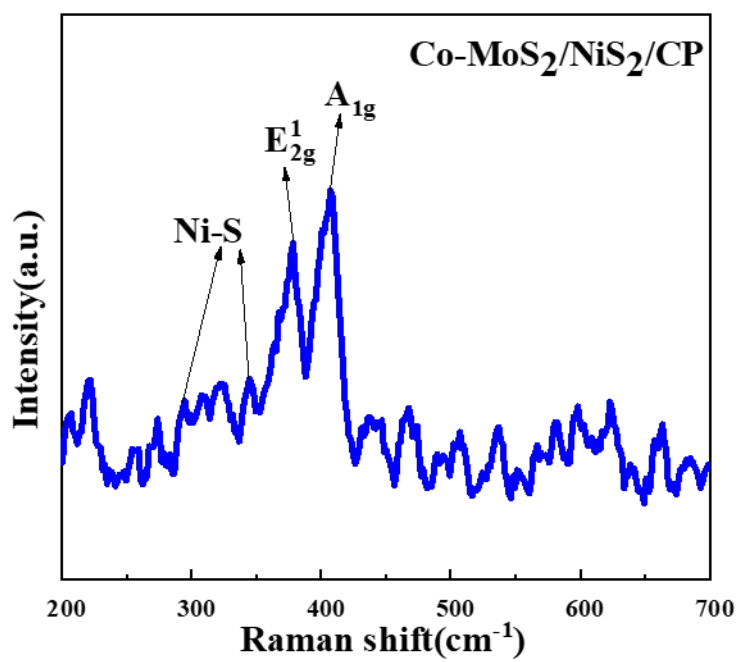

**Fig. S1.** Raman spectrum of Co-MoS<sub>2</sub>/NiS<sub>2</sub>/CP.

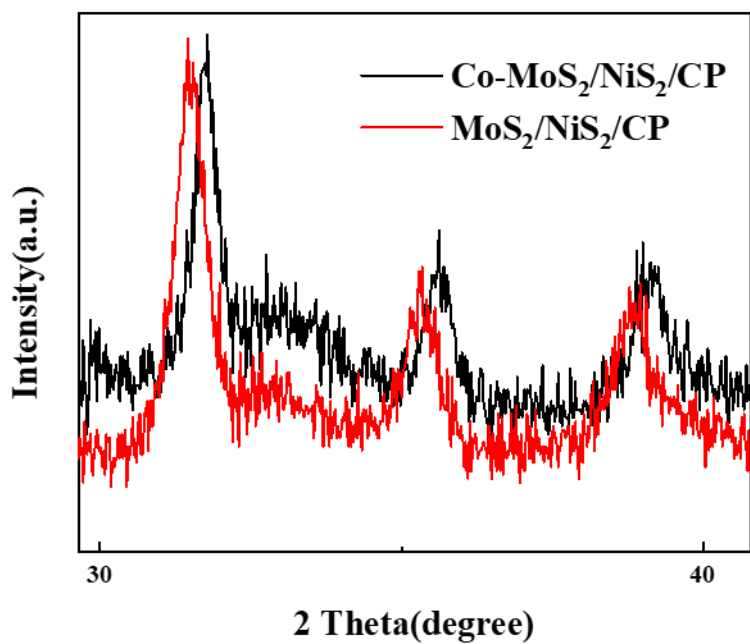

**Fig. S2.** XRD patterns of Co-MoS<sub>2</sub>/NiS<sub>2</sub>/CP and NiS<sub>2</sub>/MoS<sub>2</sub>/CP.

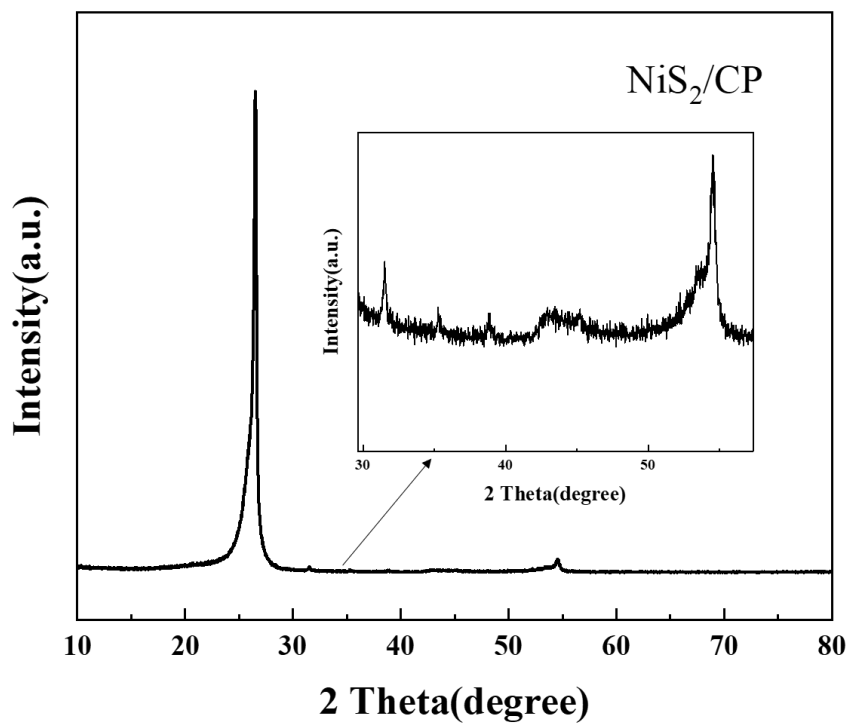

**Fig. S3.** XRD patterns of NiS<sub>2</sub>/CP sample.

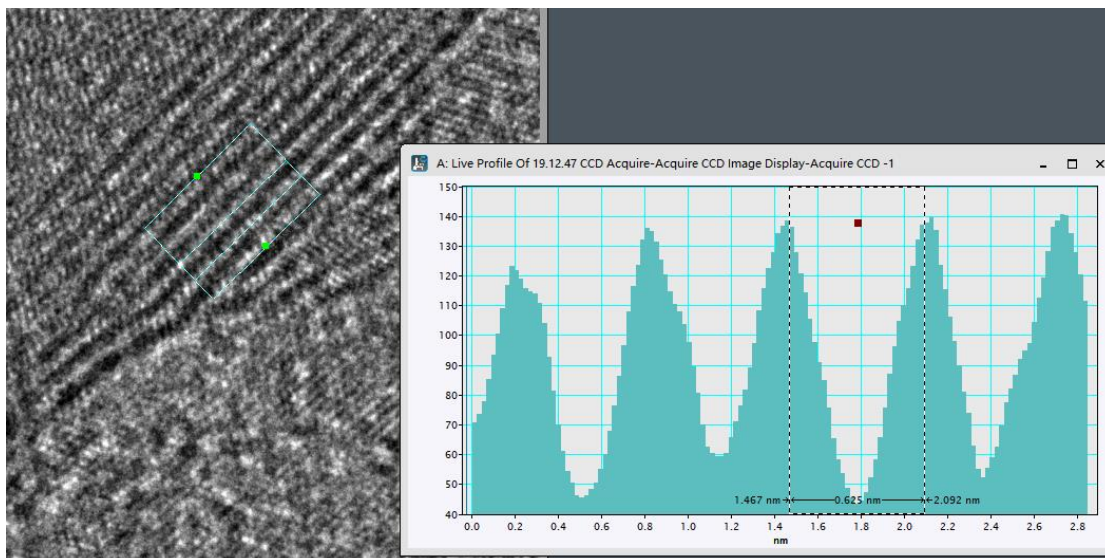

**Fig. S4.** The lattice distances of MoS<sub>2</sub> in HRTEM image,  $d=0.62\text{nm}$ .

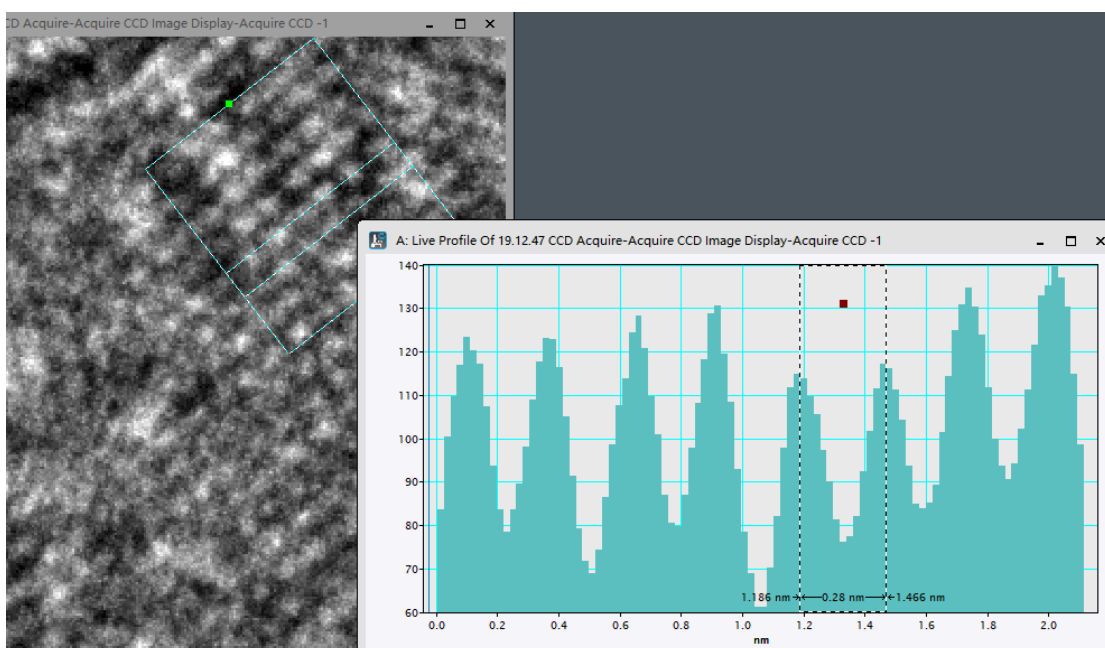

**Fig. S5.** The lattice distances of NiS<sub>2</sub> in HRTEM image,  $d=0.28\text{nm}$ .

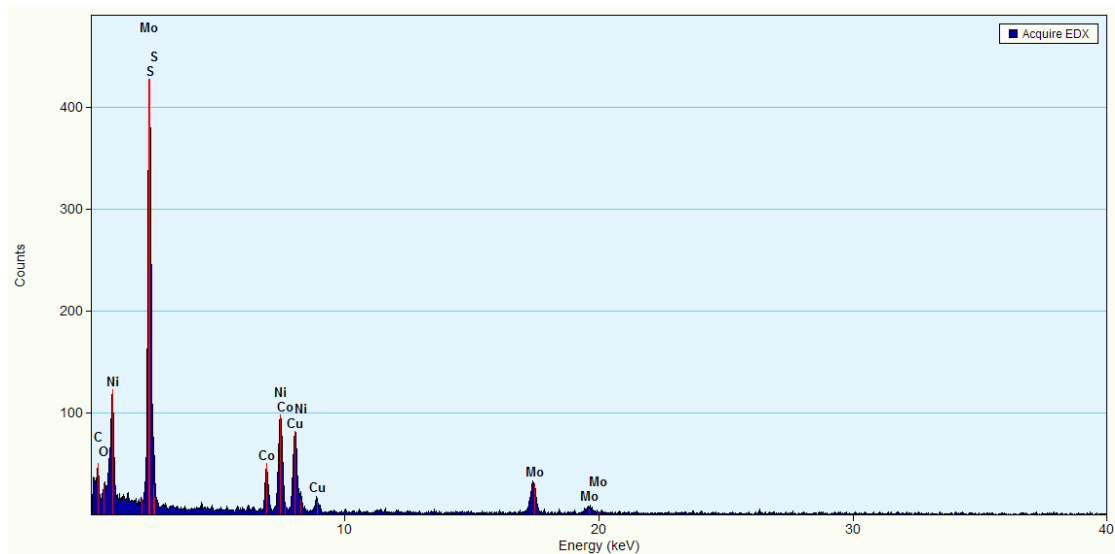

**Fig. S6.** EDS spectra of Co-MoS<sub>2</sub>/NiS<sub>2</sub>/CP sample.

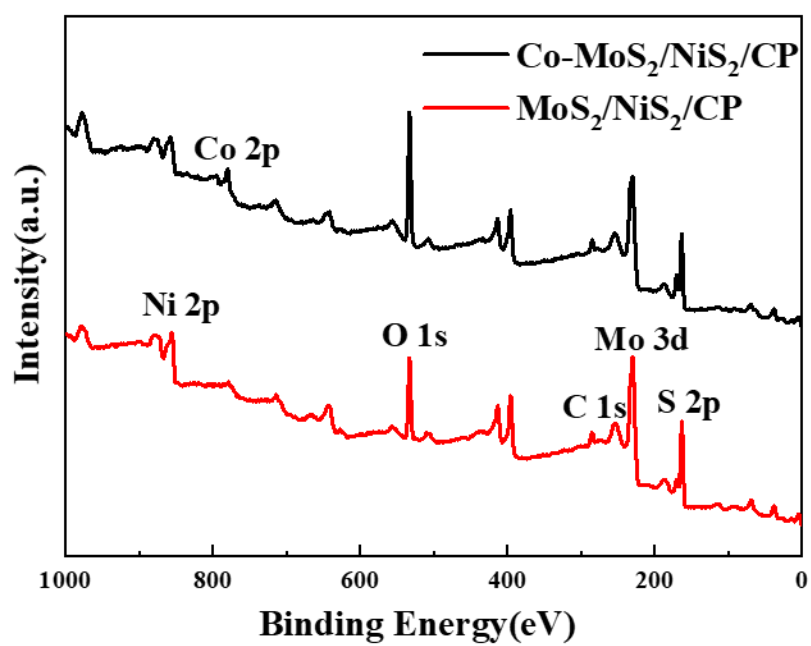

**Fig. S7.** XPS spectra of Co-MoS<sub>2</sub>/NiS<sub>2</sub>/CP and NiS<sub>2</sub>/MoS<sub>2</sub>/CP catalyst.

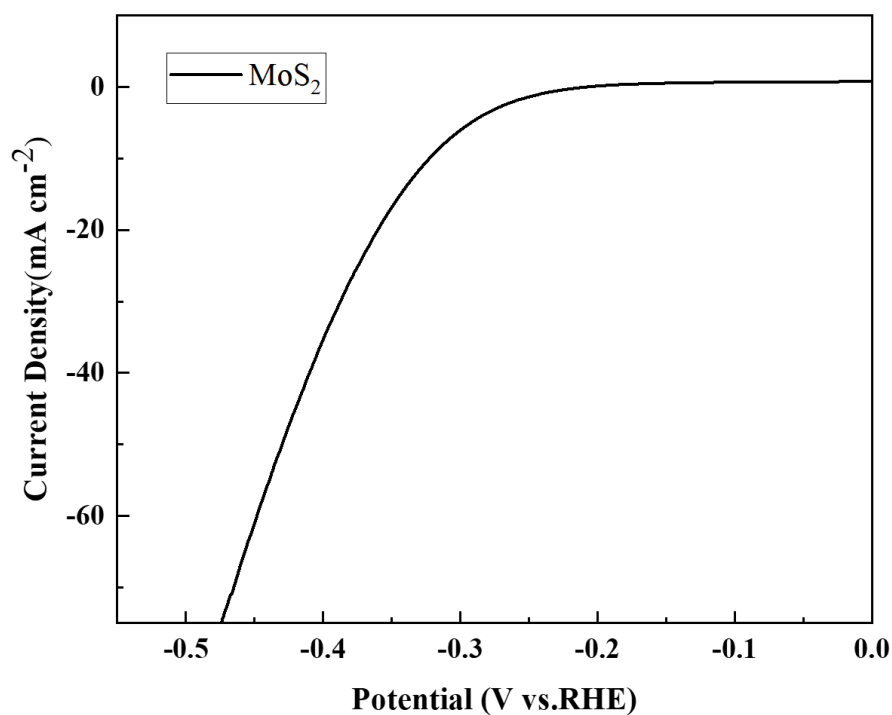

**Fig. S8.** LSV curve of pure MoS<sub>2</sub> in 1.0 M KOH for HER.

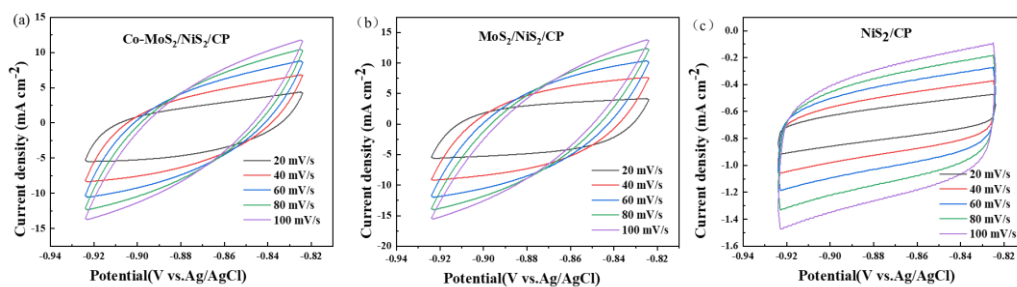

**Fig. S9.** The cyclic voltammetry (CV) curves of (a) Co-MoS<sub>2</sub>/NiS<sub>2</sub>/CP, (b) NiS<sub>2</sub>/MoS<sub>2</sub>/CP and (c) NiS<sub>2</sub>/CP at various scan rates for the calculation of electrochemical double-layer capacitances.

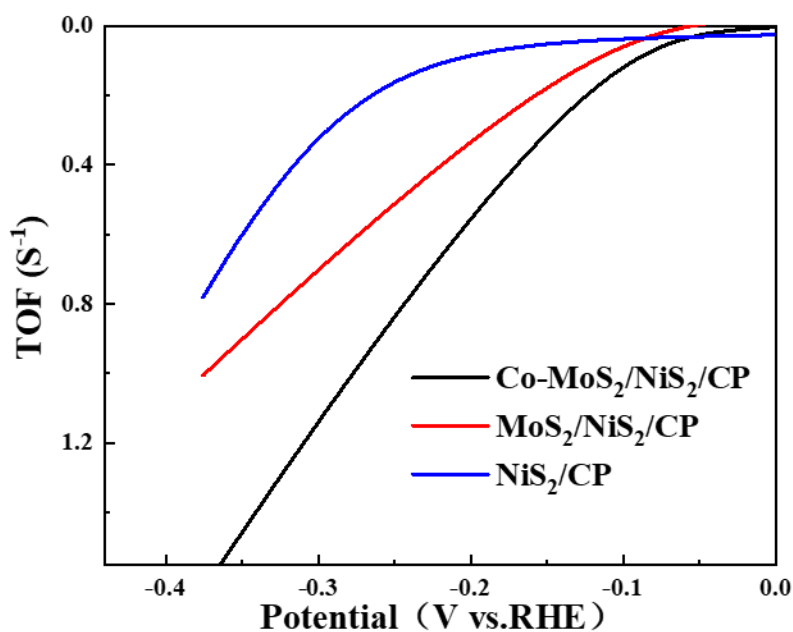

**Fig. S10.** TOF values of Co-MoS<sub>2</sub>/NiS<sub>2</sub>/CP, MoS<sub>2</sub>/NiS<sub>2</sub>/CP and NiS<sub>2</sub>/CP for HER.

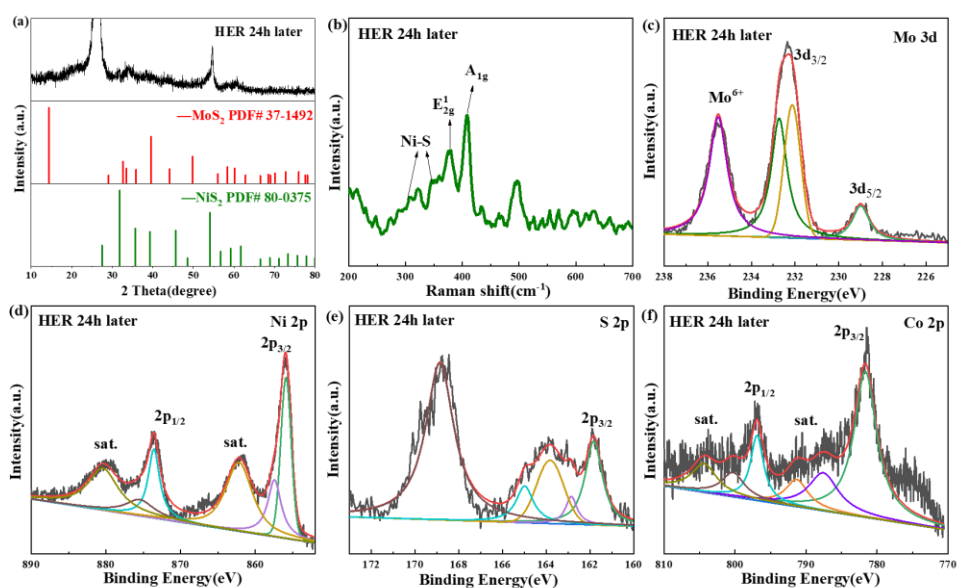

**Fig. S11.** (a) XRD, (b) Raman, and (c) Mo 3d, (d) Ni 2p, (e) S 2p, (f) Co 2p XPS spectra of Co-MoS<sub>2</sub>/NiS<sub>2</sub>/CP after 24h HER test.

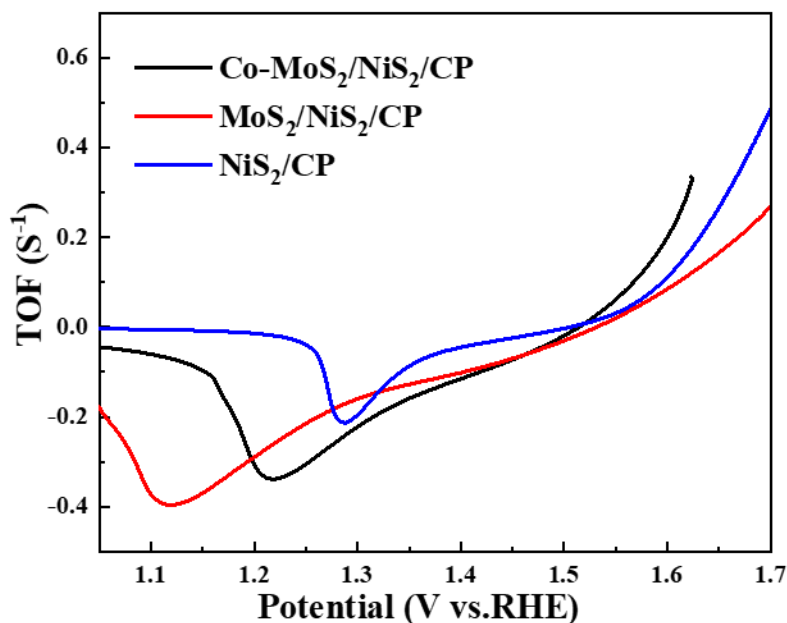

**Fig. S12.** TOF values of Co-MoS<sub>2</sub>/NiS<sub>2</sub>/CP, MoS<sub>2</sub>/NiS<sub>2</sub>/CP and NiS<sub>2</sub>/CP for OER.

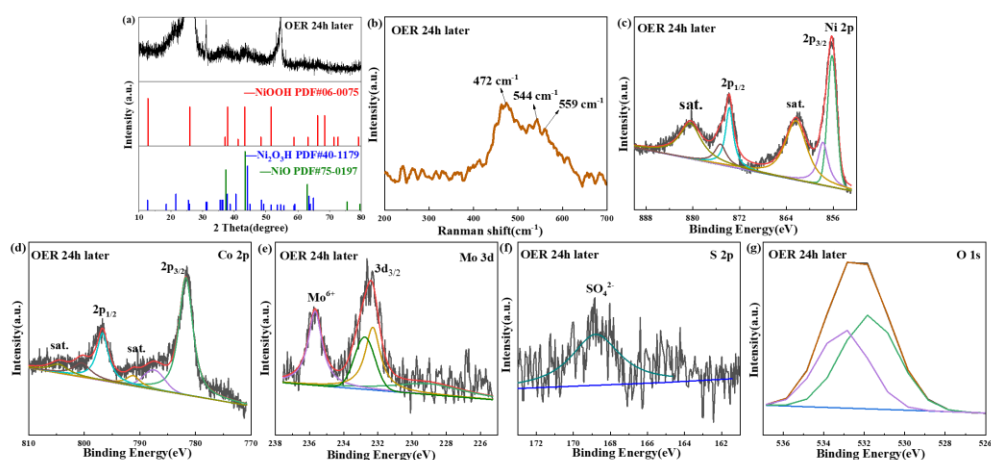

**Fig. S13.** (a) XRD, (b) Raman, and (c) Ni 2p, (d) Co 2p, (e) Mo 3d, (f) S 2p, (g) O 1s XPS spectra of Co-MoS<sub>2</sub>/NiS<sub>2</sub>/CP after 24h OER test.



**Table S1.** The HER performance of Co-MoS<sub>2</sub>/NiS<sub>2</sub>/CP compared with other catalysts

| Catalysts                                    | Electrolyte                          | $\eta_{j=10 \text{ mA cm}^{-2}}(\text{mV})$ | TOF ( $\text{H}_2 \text{ S}^{-1}$ )         | Ref       |
|----------------------------------------------|--------------------------------------|---------------------------------------------|---------------------------------------------|-----------|
| <b>Co-MoS<sub>2</sub>/NiS<sub>2</sub>/CP</b> | 1.0M KOH                             | 109                                         | 1.47 $\text{H}_2 \text{ s}^{-1}$ at 350 mV  | This work |
| <b>MoS<sub>2</sub>/NiS<sub>2</sub>/CP</b>    | 1.0M KOH                             | 129                                         | 0.91 $\text{H}_2 \text{ s}^{-1}$ at 350 mV  | This work |
| <b>NiS<sub>2</sub>/CP</b>                    | 1.0M KOH                             | 311                                         | 0.62 $\text{H}_2 \text{ s}^{-1}$ at 350 mV  | This work |
| <b>Co-Ni<sub>3</sub>N</b>                    | 1.0 M KOH                            | 194                                         | 0.146 $\text{H}_2 \text{ s}^{-1}$ at 290 mV | 1         |
| <b>NiCoN/C</b>                               | 1.0 M KOH                            | 103                                         | 0.093 $\text{H}_2 \text{ s}^{-1}$ at 200 mV | 2         |
| <b>Co-NiS<sub>2</sub> NSs</b>                | 1.0 M KOH                            | 80                                          | 0.55 $\text{H}_2 \text{ s}^{-1}$ at 100 mV  | 3         |
| <b>Co<sub>1</sub>/PCN</b>                    | 0.5 M H <sub>2</sub> SO <sub>4</sub> | 151                                         | 5.89 $\text{H}_2 \text{ s}^{-1}$ at 100 mV  | 4         |
| <b>CoN<sub>x</sub>/C</b>                     | 0.5 M H <sub>2</sub> SO <sub>4</sub> | 133                                         | 6.5 $\text{H}_2 \text{ s}^{-1}$ at 200 mV   | 5         |

Calculated on the basis of the assumption of 100% participation of all Ni active site in the HER.

**Table S2.** The OER performance of Co-MoS<sub>2</sub>/NiS<sub>2</sub>/CP compared with other catalysts

| Catalysts                                                    | Electrolyte | $\eta_{j=10 \text{ mA cm}^{-2}}(\text{mV})$ | TOF ( $\text{O}_2 \text{ S}^{-1}$ )                      | Ref       |
|--------------------------------------------------------------|-------------|---------------------------------------------|----------------------------------------------------------|-----------|
| <b>Co-MoS<sub>2</sub>/NiS<sub>2</sub>/CP</b>                 | 1.0M KOH    | 323                                         | 0.159 $\text{O}_2 \text{ s}^{-1}$ at 350 mV <sup>a</sup> | This work |
| <b>MoS<sub>2</sub>/NiS<sub>2</sub>/CP</b>                    | 1.0M KOH    | 351                                         | 0.092 $\text{O}_2 \text{ s}^{-1}$ at 350 mV <sup>a</sup> | This work |
| <b>NiS<sub>2</sub>/CP</b>                                    | 1.0M KOH    | 397                                         | 0.071 $\text{O}_2 \text{ s}^{-1}$ at 350 mV <sup>a</sup> | This work |
| <b><math>\alpha</math>-Ni(OH)<sub>2</sub> hollow spheres</b> | 1.0 M KOH   | 331                                         | 0.036 $\text{O}_2 \text{ s}^{-1}$ at 350 mV <sup>a</sup> | 6         |
| <b><math>\beta</math>-Ni(OH)<sub>2</sub> hexagonal NPs</b>   | 1.0 M KOH   | 444                                         | 0.003 $\text{O}_2 \text{ s}^{-1}$ at 350 mV <sup>a</sup> | 6         |
| <b>Fe,Ni-CoS<sub>2</sub></b>                                 | 1.0 M KOH   | 242                                         | 0.14 $\text{O}_2 \text{ s}^{-1}$ at 300 mV <sup>b</sup>  | 7         |
| <b><math>\beta</math>-Ni(OH)<sub>2</sub> nanoburrs</b>       | 1.0 M KOH   | 300                                         | 4.71 $\text{O}_2 \text{ s}^{-1}$ at 1.45 V <sup>b</sup>  | 8         |

|            |           |   |                                                                |   |
|------------|-----------|---|----------------------------------------------------------------|---|
| NiFe-LDH-V | 1.0 M KOH | - | 0.165 O <sub>2</sub> s <sup>-1</sup> at<br>1.50 V <sup>b</sup> | 9 |
|------------|-----------|---|----------------------------------------------------------------|---|

<sup>a</sup>Calculated on the basis of the assumption of 100% participation of all Ni active site in the OER. <sup>b</sup> Calculated using the ORR current from the RRDE experiment.

## References

- 1 X. Q. Zheng, L. S. Peng, L. Li, N. Yang, Y. J. Yang, J. Li, J. C. Wang and Z. D. Wei, *Chem. Sci.*, 2018, **9**, 1822-1830.
- 2 J. X. Feng, J. Q. Wu, Y. X. Tong and G.-R. Li, *J. Am. Chem. Soc.*, 2018, **140**, 610-617.
- 3 J. Yin, J. Jin, H. Zhang, M. Lu, Y. Peng, B. Huang, P. Xi and C. H. Yan, *Angew. Chem. Int. Ed.*, 2019, **58**, 18676-18682.
- 4 L. Zeng, K. Sun, Z. Yang, S. Xie, Y. Chen, Z. Liu, Y. Liu, J. Zhao, Y. Liu and C. Liu, *J. Mater. Chem. A*, 2018, **6**, 4485-4493.
- 5 J. Dong, F. Q. Zhang, Y. Yang, Y. B. Zhang, H. He, X. Huang, X. Fan and X. M. Zhang, *Appl. Catal. B*, 2019, **243**, 693-702.
- 6 M. Gao, W. Sheng, Z. Zhuang, Q. Fang, S. Gu, J. Jiang and Y. Yan, *J. Am. Chem. Soc.*, 2014, **136**, 7077-7084.
- 7 W. Peng, A. Deshmukh, N. Chen, Z. Lv, S. Zhao, J. Li, B. Yan, X. Gao, L. Shang, Y. Gong, L. Wu, M. Chen, T. Zhang and H. Gou, *Acs Catal.*, 2022, **12**, 3743-3751.
- 8 S. Anantharaj, P. E. Karthik and S. Kundu, *Catal. Sci. Technol.*, 2017, **7**, 882-893.
- 9 D. Chen, J. Qiu, X. Chen, S. Chen, J. Zhang and Z. Peng, *J. Phys. Chem. Lett.*, 2023, **14**, 2148-2154.
